# Supplementary material
Source: MDPI journal article supplement (https://www.mdpi.com/1996-1073/14/5/1322)
Supplement: s1 [file s1]

## Supporting Information

# Sodium Tungsten Oxide Bronze Nanowires Bundles in Adsorption of Methylene Blue Dye under UV and Visible Light Exposure

Kunyat Thummavichai <sup>1,2,\*</sup>, Le Anh Thi <sup>3</sup>, Swee-Yong Pung <sup>3</sup>, Oluwafunmilola Ola <sup>4</sup>, Mian Zahid Hussain <sup>2</sup>, Yu Chen <sup>2</sup>, Fang Xu <sup>4</sup>, Wenting Chen <sup>1</sup>, Nannan Wang <sup>1,\*</sup> and Yanqiu Zhu <sup>2,\*</sup>

<sup>1</sup> Key Laboratory of New Processing Technology for Nonferrous Metals and Materials, School of Resources, Environment and Materials, Guangxi University, Guangxi 530004, China; 2826197790@qq.com

<sup>2</sup> College of Engineering, Mathematics and Physical Sciences, University of Exeter, Exeter EX4 4PY, UK; mh673@exeter.ac.uk (M.Z.H.); yc465@exeter.ac.uk (Y.C.)

<sup>3</sup> School of Materials and Mineral Resources Engineering, Engineering Campus, Universiti Sains Malaysia, Penang 11800, Malaysia; leanhthi@student.usm.my (L.A.T.); sypung@usm.my (S.-Y.P.)

<sup>4</sup> Advanced Materials Group, Faculty of Engineering, The University of Nottingham, Nottingham NG7 2RD, UK; Oluwafunmilola.Ola1@nottingham.ac.uk (O.O.); fang.xu@nottingham.ac.uk (F.X.)

\* Correspondence: kt302@exeter.ac.uk (K.T.); wangnannan@gxu.edu.cn (N.W.); Y.Zhu@exeter.ac.uk (Y.Z.)

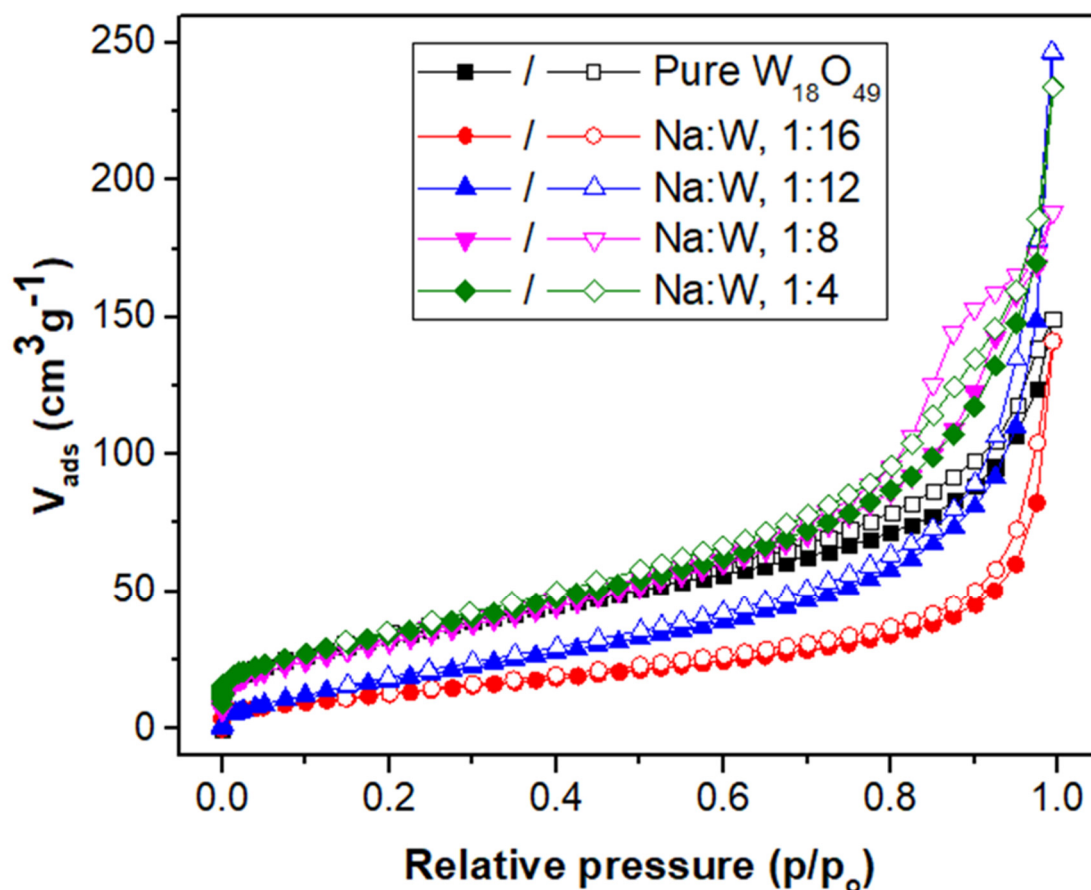

**Figure S1.** Nitrogen sorption isotherms at 77 K for pure  $W_{18}O_{49}$  and  $Na_xWO_3$  samples prepared at dopant ratios of 1:16, 1:12, 1:8 and 1:4.

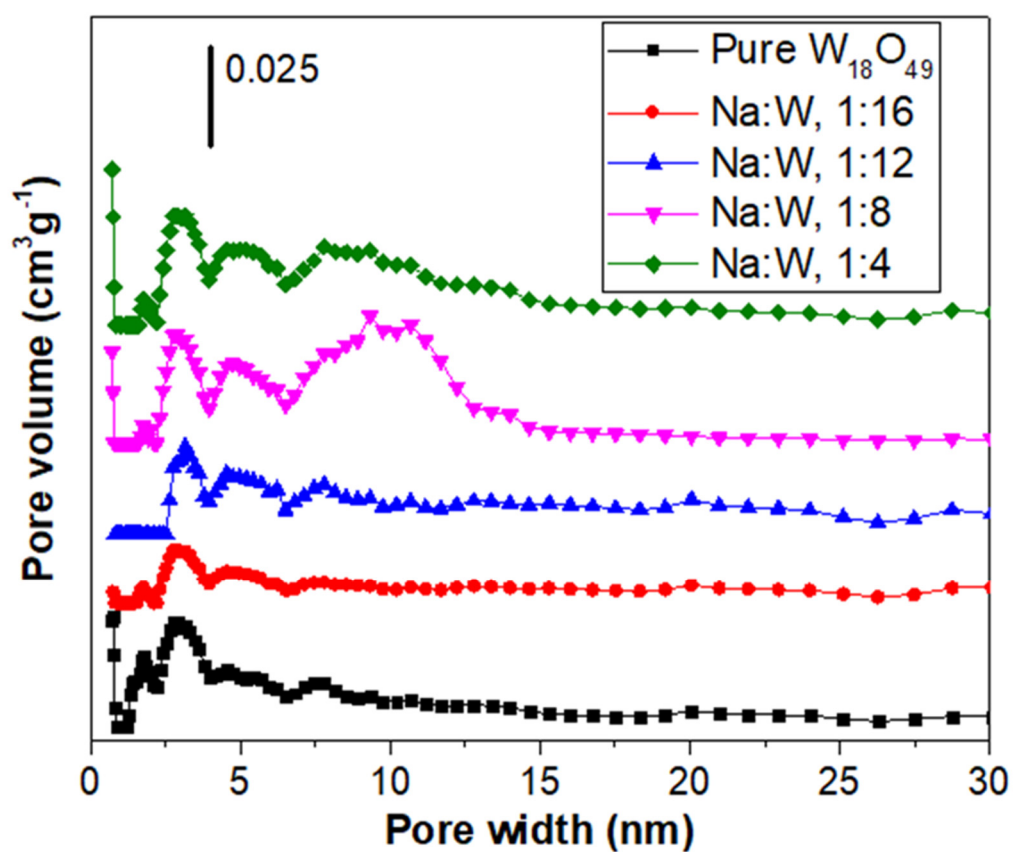

**Figure S2.** NLDFT Pore size distributions for pure  $W_{18}O_{49}$  and  $Na_yWO_3$  samples prepared at dopant ratios of 1:16, 1:12, 1:8 and 1:4.

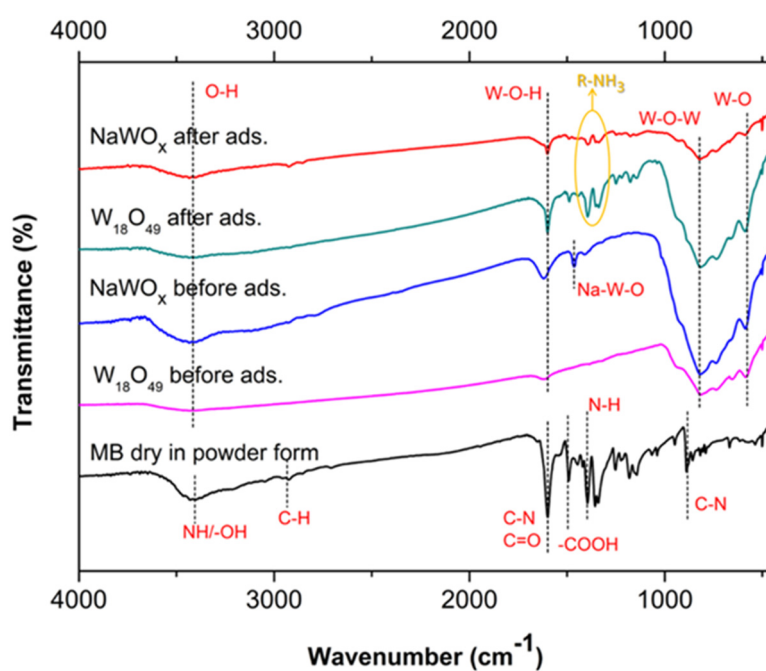

**Figure S3.** FTIR spectra of the MB dye in powder form,  $W_{18}O_{49}$  and  $Na_yWO_3$  (1:8) before adsorption,  $W_{18}O_{49}$  and  $Na_yWO_3$  (1:8) after adsorption of MB under dark conditions.
